# Supplementary material for: Microbial diversification is maintained in an experimentally evolved synthetic community
Source: PubMed Central journal article supplement (PMC11575400; doi:10.1128/msystems.01053-24), 2024-10-15
Supplement: reviewer-comments.pdf [file reviewer-comments.pdf]

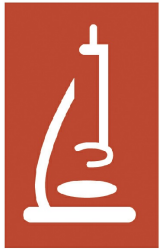

AMERICAN  
SOCIETY FOR  
MICROBIOLOGY

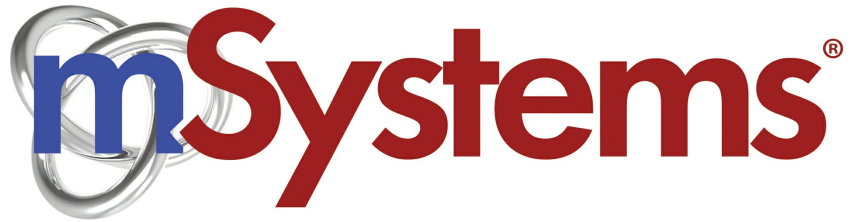

# Microbial diversification is maintained in an experimentally evolved synthetic community

Zahraa Al-Tameemi and Alejandra Rodríguez-Verdugo

*Corresponding Author(s): Alejandra Rodríguez-Verdugo, University of California Irvine*

---

## Review Timeline:

|                     |                    |
|---------------------|--------------------|
| Submission Date:    | August 5, 2024     |
| Editorial Decision: | August 27, 2024    |
| Revision Received:  | September 10, 2024 |
| Accepted:           | September 11, 2024 |

---

*Editor: William Harcombe*

*Reviewer(s): The reviewers have opted to remain anonymous.*

## Transaction Report:

(Note: With the exception of the correction of typographical or spelling errors that could be a source of ambiguity, letters and reports are not edited. The original formatting of letters and referee reports may not be reflected in this compilation.)

**DOI: <https://doi.org/10.1128/msystems.01053-24>**

Re: mSystems01053-24 (Microbial diversification is maintained in an experimentally evolved synthetic community)

Dear Dr. Alejandra Rodríguez-Verdugo:

Thank you for the privilege of reviewing your work. Below you will find my comments, instructions from the mSystems editorial office, and the reviewer comments.

Thank you for your work addressing concerns with the manuscript. Several further minor issues were raised for the authors consideration.

Please return the manuscript within 60 days; if you cannot complete the modification within this time period, please contact me. If you do not wish to modify the manuscript and prefer to submit it to another journal, notify me immediately so that the manuscript may be formally withdrawn from consideration by mSystems.

### Revision Guidelines

To submit your modified manuscript, log into the submission site at <https://msystems.msubmit.net/cgi-bin/main.plex>. Go to Author Tasks and click the appropriate manuscript title to begin. The information you entered when you first submitted the paper will be displayed; update this as necessary. Note the following requirements:

- Upload point-by-point responses to the issues raised by the reviewers in a file named "Response to Reviewers," NOT in your cover letter.
- Upload a compare copy of the manuscript (without figures) as a "Marked-Up Manuscript" file.
- Upload a clean .DOC/.DOCX version of the revised manuscript and remove the previous version.
- Each figure must be uploaded as a separate, editable, high-resolution file (TIFF or EPS preferred), and any multipanel figures must be assembled into one file.
- Any [supplemental material](#) intended for posting by ASM should be uploaded with their legends separate from the main manuscript. You can combine all supplemental material into one file (preferred) or split it into a maximum of 10 files with all associated legends included.

For complete guidelines on revision requirements, see our [Submission and Review Process](#) webpage. Submission of a paper that does not conform to guidelines may delay acceptance of your manuscript.

**Data availability:** ASM policy requires that data be available to the public upon online posting of the article, so please verify all links to sequence records, if present, and make sure that each number retrieves the full record of the data. If a new accession number is not linked or a link is broken, provide mSystems production staff with the correct URL for the record. If the accession numbers for new data are not publicly accessible before the expected online posting of the article, publication may be delayed; please contact production staff ([mSystems@asmusa.org](mailto:mSystems@asmusa.org)) immediately with the expected release date.

**Publication Fees:** For information on publication fees and which article types are subject to charges, visit our [website](#). If your manuscript is accepted for publication and any fees apply, you will be contacted separately about payment during the production process; please follow the instructions in that e-mail. Arrangements for payment must be made before your article is published.

**ASM Membership:** Corresponding authors may [join or renew ASM membership](#) to obtain discounts on publication fees. Need to upgrade your membership level? Please contact Customer Service at [Service@asmusa.org](mailto:Service@asmusa.org).

The ASM Journals program strives for constant improvement in our submission and publication process. Please tell us how we can improve your experience by taking this quick [Author Survey](#).

Thank you for submitting your paper to mSystems.

Sincerely,  
William Harcombe  
Editor  
mSystems

Reviewer #1 (Comments for the Author):

The authors have done an excellent job in revising their manuscript. I was quite critical regarding the storyline and conclusions when reading the initial version of the paper. Now, I'm pleased to see that the manuscript is much improved and attractive to read. I appreciate that the authors conducted extra experiments. The data on negative-frequency dependent selection has

become much stronger and while still negative, we can now reject this hypothesis with high confidence. The evolutionary replay experiment is a great gain for the paper. Although the results do not recover the selective sweeps observed in the initial mono-culture replicates, they clearly show the stabilising effect of *A. johnsonii* in co-cultures. I have a few extra comments.

1. The results of the replay experiment could be highlighted more clearly. I propose to mention them in the abstract.
2. Abstract, lines 28-30. The sentence reads odd as it states that the two morphotypes co-exist (with one of them dominating), while line 24 emphasises a selective sweep. This causes confusion. I assume this sentence refers to the replay experiment. I thus recommend to explicitly state this and to emphasise the key results: *A. johnsonii* has a stabilising effect.
3. Line 191. In this section, phenotypic assays are described and not physiological tradeoffs. Please clarify.
4. Fig. 6 and lines 399-401. Since there is no frequency effect, it would be possible to pool the data across frequencies to conduct a global analysis with higher statistical power. I.e., one could test whether the relative fitness of the small genotype is lower in co-culture than in mono-culture, which would point towards a stabilising effect in co-culture.

Reviewer #2 (Comments for the Author):

The authors have addressed my concerns - thank you.

I have only one minor edit to point out - Line 698 "got altered" should be "were altered".

We thank the two reviewers for reviewing our resubmission and providing additional comments. Based on these comments, we have made revisions.

For easy reference, we have color-coded this letter as follows: The reviewers' original comments are in blue. Our responses are in regular typeface. Our changes in response to the reviewers' comments are in red. Finally, our modifications to the original manuscript are underlined in the revised manuscript with track changes.

## REVIEWS

\*\*\*\*\*

### Reviewer #1

The authors have done an excellent job in revising their manuscript. I was quite critical regarding the storyline and conclusions when reading the initial version of the paper. Now, I'm pleased to see that the manuscript is much improved and attractive to read. I appreciate that the authors conducted extra experiments. The data on negative-frequency dependent selection has become much stronger and while still negative, we can now reject this hypothesis with high confidence. The evolutionary replay experiment is a great gain for the paper. Although the results do not recover the selective sweeps observed in the initial mono-culture replicates, they clearly show the stabilising effect of *A. johnsonii* in co-cultures. I have a few extra comments.

Thank you very much! We are happy you find the paper improved and the new experiments have strengthened the story. We have addressed your additional comments.

1. The results of the replay experiment could be highlighted more clearly. I propose to mention them in the abstract.

Thank you for this suggestion. **We have highlighted the replay experiment in the abstract.** Please see our comment below.

2. Abstract, lines 28-30. The sentence reads odd as it states that the two morphotypes co-exist (with one of them dominating), while line 24 emphasises a selective sweep. This causes confusion. I assume this sentence refers to the replay experiment. I thus recommend to explicitly state this and to emphasise the key results: *A. johnsonii* has a stabilising effect.

Thank you for pointing out this oddity. You are correct that this sentence referred to the replay experiment, but we see how it came out confusing. Based on your suggestion, we have changed the sentence to explicitly refer to the replay experiment and the stabilizing effect of *A. johnsonii*. **The revised sentence in the abstract (lines 28-30) reads: "Finally, we conducted an**

*evolutionary 'replay' experiment to assess whether the presence or absence of A. johnsonii influenced the coexistence of morphotypes at the population level. Interestingly, A. johnsonii had a stabilizing effect on the co-culture."*

3. Line 191. In this section, phenotypic assays are described and not physiological tradeoffs. Please clarify.

Thank you for catching our typo. These are indeed physiological assays and not physiological tradeoffs. **We have corrected the heading.**

4. Fig. 6 and lines 399-401. Since there is no frequency effect, it would be possible to pool the data across frequencies to conduct a global analysis with higher statistical power. I.e., one could test whether the relative fitness of the small genotype is lower in co-culture than in mono-culture, which would point towards a stabilising effect in co-culture.

We appreciate this suggestion. We pooled the data across frequencies and conducted a two-tailed t-test to assess whether the relative fitness of the small genotypes was different in co-culture than mono-culture. The differences were not statistically different despite the higher statistical power (two-tailed t-test, d.f. 28,  $p = 0.8139$ ). We also tested whether the relative fitness of the small genotype is lower in co-culture than in mono-culture, as you suggested. Still, the differences were not statistically significant (one-tailed t-test, d.f. 28,  $p = 0.407$ ).

*We revised the text to add the results from the two-tailed t-test (lines 398-404): "Finally, we tested whether the relative fitness of the small genotype differed in monoculture than in coculture by pooling data across frequencies. We did not find significant differences in the small genotype's relative fitness, whether A. johnsonii was present or absent (two-tailed t-test, d.f. 28, p-value = 0.814). In conclusion, these results suggest that frequency-dependent selection is not a process driving coexistence between the fleQ and small genotypes from replicate #2, and the presence of A. johnsonii does not influence the relative fitness of the small genotype."*

Reviewer #2 (Comments for the Author):

The authors have addressed my concerns - thank you.

Thank you very much!

I have only one minor edit to point out - Line 698 "got altered" should be "were altered".

Thank you for catching our typo. **We have corrected the sentence in the figure legend of Fig.7.**

Re: mSystems01053-24R1 (Microbial diversification is maintained in an experimentally evolved synthetic community)

Dear Dr. Alejandra Rodríguez-Verdugo:

Your manuscript has been accepted, and I am forwarding it to the ASM production staff for publication. Your paper will first be checked to make sure all elements meet the technical requirements. ASM staff will contact you if anything needs to be revised before copyediting and production can begin. Otherwise, you will be notified when your proofs are ready to be viewed.

**Data Availability:** ASM policy requires that data be available to the public upon online posting of the article, so please verify all links to sequence records, if present, and make sure that each number retrieves the full record of the data. If a new accession number is not linked or a link is broken, provide production staff with the correct URL for the record. If the accession numbers for new data are not publicly accessible before the expected online posting of the article, publication may be delayed; please contact ASM production staff immediately with the expected release date.

**Publication Fees:** For information on publication fees and which article types have charges, please visit our [website](#). We have partnered with Copyright Clearance Center (CCC) to collect author charges. If fees apply to your paper, you will receive a message from no-reply@copyright.com with further instructions. For questions related to paying charges through RightsLink, please contact CCC at ASM\_Support@copyright.com or toll free at +1-877-622-5543. CCC makes every attempt to respond to all emails within 24 hours.

**ASM Membership:** Corresponding authors may [join or renew ASM membership](#) to obtain discounts on publication fees. Need to upgrade your membership level? Please contact Customer Service at Service@asmusa.org.

**PubMed Central:** ASM deposits all mSystems articles in PubMed Central and international PubMed Central-like repositories immediately after publication. Thus, your article is automatically in compliance with the NIH access mandate. If your work was supported by a funding agency that has public access requirements like those of the NIH (e.g., the Wellcome Trust), you may post your article in a similar public access site, but we ask that you specify that the release date be no earlier than the date of publication on the mSystems website.

**Embargo Policy:** A press release may be issued as soon as the manuscript is posted on the [mSystems Latest Articles webpage](#). The corresponding author will receive an email with the subject line "ASM Journals Author Services Notification" when the article is available online.

**Cover Image Submissions:** If you would like to submit a potential Cover Image, please email a file and a short legend to msystems@asmusa.org. Please note that we can only consider images that (i) the authors created or own and (ii) have not been previously published. By submitting, you agree that the image can be used under the same terms as the published article. Image File requirements: TIF/EPS, 7.5 inches wide by 8.25 inches tall (at least 2,250 pixels wide by 2,475 pixels tall), minimum 300 dpi resolution (600 dpi preferred), RGB, and no figure elements, e.g., arrows or panel labels. The legend should be a short description of the image, 1-2 sentences recommended. Please download and use this interactive template in Adobe to ensure that your proposed cover image meets our size requirements (<https://journals.asm.org/pb-assets/pdf-text-excel-files/ASM-Interactive-Sizing-Cover-Template-1715689791.pdf>).

**Author Video:** For mSystems research articles, you are welcome to submit a short author video for your recently accepted paper. Videos are normally 1 minute long and are a great opportunity for junior authors to get greater exposure. Importantly, this video will not hold up the publication of your paper and you can submit it at any time.

Details of the video are:

- Minimum resolution of 1280 x 720
- .mov or .mp4 video format
- Provide video in the highest quality possible but do not exceed 1080p
- Provide a still/profile picture that is 640 (w) x 720 (h) max
- Provide the script that was used

We recognize that the video files can become quite large, so to avoid quality loss ASM suggests sending the video file via <https://www.wetransfer.com/>. When you have a final version of the video and the still ready to share, please send it to mSystems staff at mSystems@asmusa.org.

Thank you for submitting your paper to mSystems.

Sincerely,  
William Harcombe  
Editor  
mSystems
